# Supplementary material for: Hierarchical nanoscale multi-shell Au/CeO2 hollow spheres
Source: Royal Society of Chemistry journal article supplement (doi:10.1039/c4sc01882f), 2014-01-01
Supplement: c4sc01882f1.pdf [file c4sc01882f1.pdf]

## Supplementary Information

### **Hierarchical Nanoscale Multi-shell Au/CeO<sub>2</sub> Hollow Spheres**

*Pengfei, Xu, Ranbo Yu<sup>\*</sup>, Hao Ren, Lingbo Zong, Jun Chen, Xianran Xing*

Department of Physical Chemistry, School of Metallurgical and Ecological Engineering,  
University of Science and Technology Beijing, 100083, China

\*Corresponding authors: [ranboyu@ustb.edu.cn](mailto:ranboyu@ustb.edu.cn)

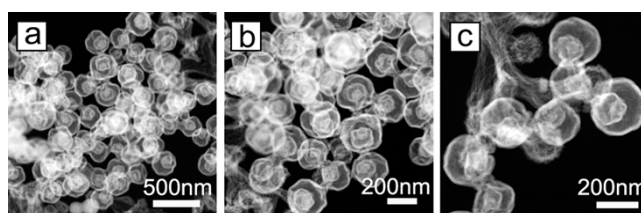

**Fig. S1** HAADF STEM images of triple-shelled ceria hollow spheres. The calcination condition: at heat ramp rate of  $10^{\circ}\text{C min}^{-1}$  with 60 min holding  $500^{\circ}\text{C}$ .

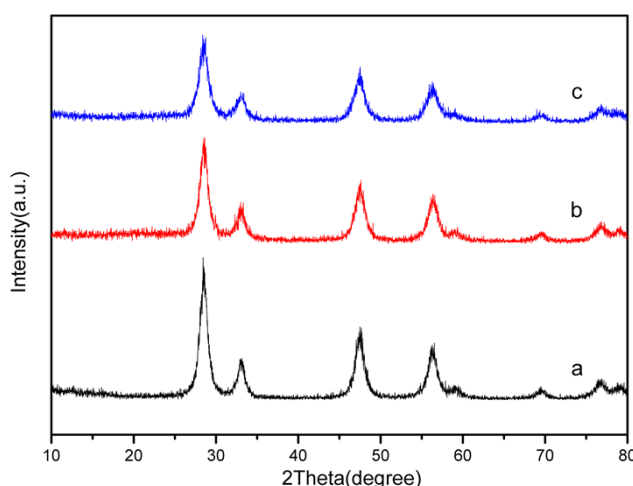

**Fig. S2** XRD patterns of a) single-shell, b) double-shell and c) triple-shelled ceria hollow spheres.

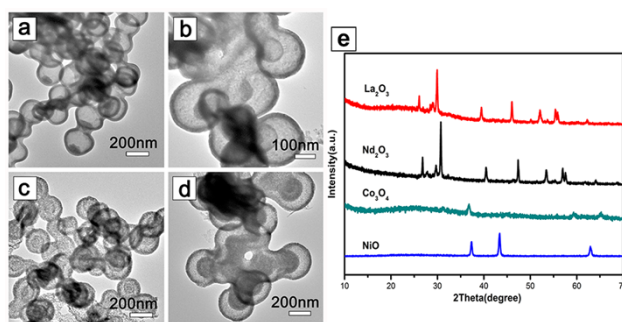

**Fig. S3** a-d) Representative TEM images of various oxide multi-shelled hollow spheres: a)  $\text{La}_2\text{O}_3$ ; b)  $\text{Nd}_2\text{O}_3$ ; c)  $\text{Co}_3\text{O}_4$ ; d)  $\text{NiO}$ . e) XRD patterns of the corresponding metal oxides.

When we substitute other metal ions ( $\text{La}^{3+}$ ,  $\text{Nd}^{3+}$ ,  $\text{Co}^{2+}$ ,  $\text{Ni}^{2+}$ ) for  $\text{Ce}^{3+}$  during hydrothermal process, corresponding multi-shelled metal oxides hollow spheres ( $\text{La}_2\text{O}_3$ ,  $\text{Nd}_2\text{O}_3$ ,  $\text{Co}_3\text{O}_4$ ,  $\text{NiO}$ ) were generated successfully as shown in Figure S3. These results confirmed the generality of our approach for hydrothermally enhanced synthesis of multi-shelled metal oxides hollow spheres.

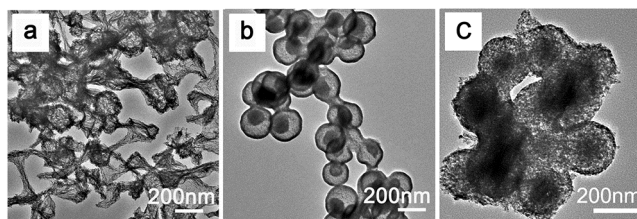

**Fig. S4** TEM images of ceria obtained under different hydrothermal temperature when maintaining the same calcination condition. a) 120°C, 6h; b) 160°C, 6h; c) 180°C, 6h. The calcination condition: at heat ramp rate of 2°C min<sup>-1</sup> with 60 min holding 500°C.

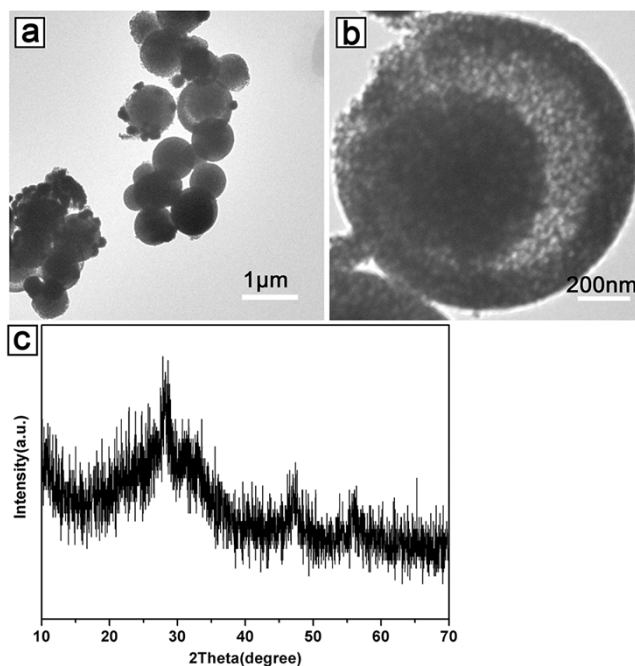

**Fig. S5** a, b) TEM images and c) XRD patterns of ceria precursors obtained under the hydrothermal condition of 180°C, 3h.

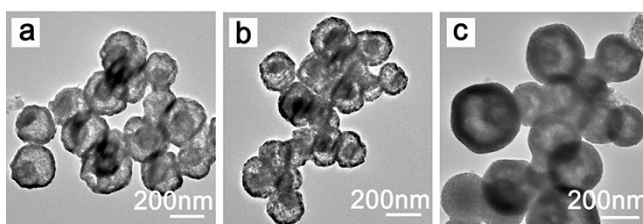

**Fig. S6** TEM images of ceria obtained under the same calcination condition after the different hydrothermal time. a) 6h; b) 12h; c) 24h. The calcination condition: at heat ramp rate of 2°C min<sup>-1</sup> with 60 min holding 500°C.

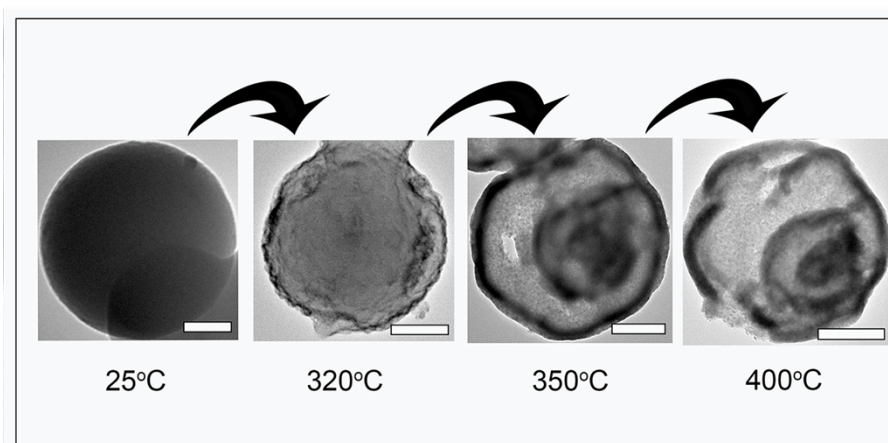

**Fig. S7** The evolution of triple-shelled ceria by track of calcination process between 25°C and 400°C. The calcination condition: the heat ramp rate was set at 10°C min<sup>-1</sup>. The scale bars: 50nm.

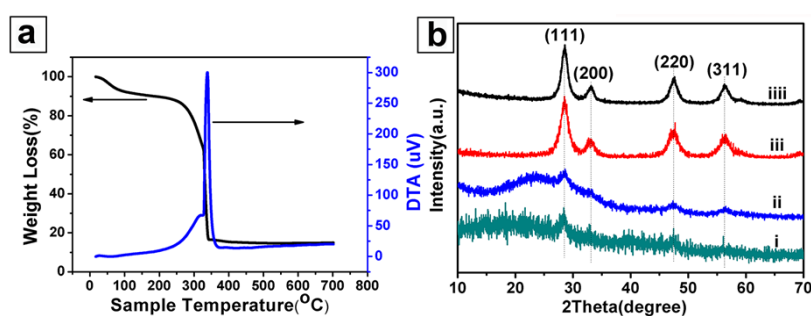

**Fig. S8.** a) TG-DTA curves of ACMSs; b) XRD patterns of immediate products obtained at different calcinations stage: i) before calcinations; ii) 320°C, 20min; iii) 350°C, 20min; iiiii) 400°C, 20min.

Figure S8 gave the TG-DTA curves of ACMSs and XRD patterns of immediate products obtained at different calcinations stage. The two exothermic peaks centered at 320°C and 340°C appeared. And the XRD patterns showed the crystallization of cerium precursors distinctly happened in the range of 320°C~350°C. So it was inferred that the exothermic peak centered at 320°C originated from combustion heat of organic species while crystallization heat of ceria contributed to the exothermic peak centered at 340°C.

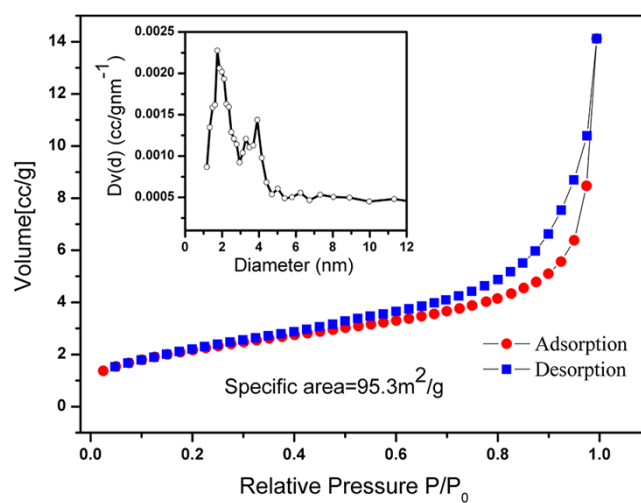

**Fig. S9** The nitrogen adsorption-desorption isotherm curves of ceria hollow spheres with triple shell. Inset: the BJH pore size distribution of ceria hollow spheres with triple shell from the adsorption branch.

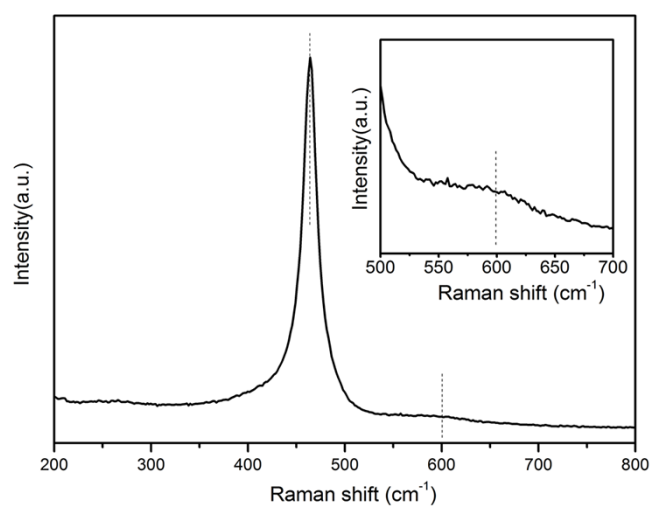

**Fig. S10** Raman spectra of ceria hollow spheres with triple shell. Inset: the regional magnification.

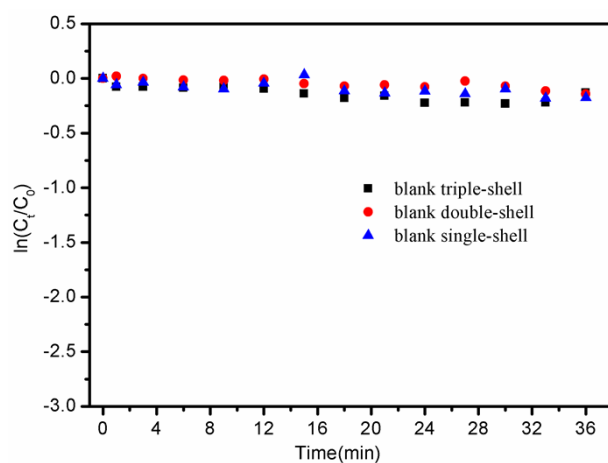

**Fig. S11** Plots of  $\ln(C_t/C_0)$  vs time by use of non-loaded MSCHSs (denoted as blank triple-shell, blank double-shell and blank single-shell).

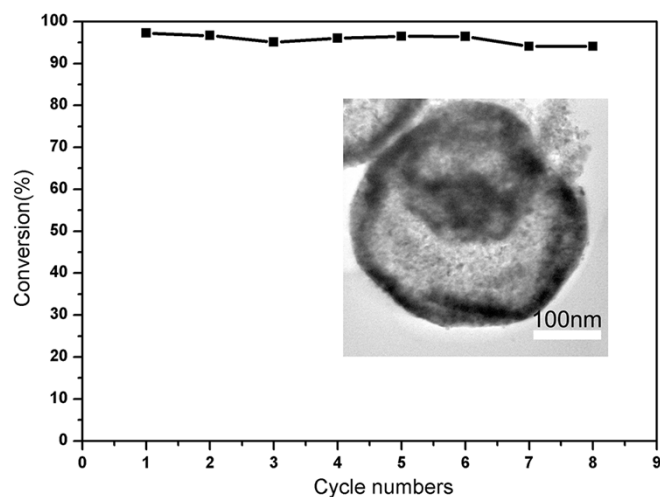

**Fig. S12.** Cycle stability of the triple-shell Au/CeO<sub>2</sub> hybrid catalyst. Inset: TEM image of the catalyst after 8 cycles.

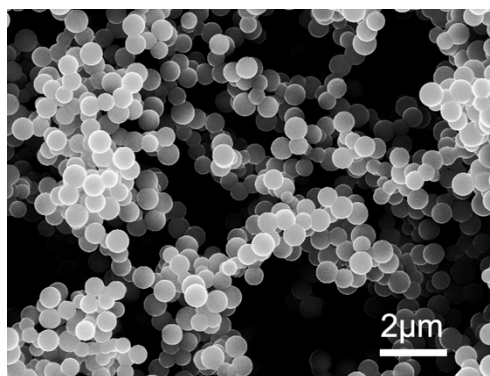

**Fig. S13** Representative SEM images of as-synthesized carbonaceous spheres.
